# Supplementary material for: A Filtering Method for Identification of Significant Target mRNAs of Coexpressed and Differentially Expressed MicroRNA Clusters
Source: J Healthc Eng. 2018 Sep 12;2018:4932904. doi: 10.1155/2018/4932904 (PMC6157198; doi:10.1155/2018/4932904)
Supplement: Supplementary 1 — Additional File 1: the complete list of 57 miRNAs. [file 4932904.f1.txt]

miRNA	ID	Solid cancer score	Normal tissues score
miR-21	47	0.0801	-0.2643
miR-138-2	133	-0.055	0.1815
miR-218-2	221	-0.0535	0.1765
miR-23b	51	-0.0516	0.17
miR-128a prec	113	-0.0498	0.1642
miR-29b-2	95	0.0457	-0.1508
miR-195	184	0.0404	-0.1333
miR-17-5p	41	0.0383	-0.1263
miR-9-3	28	-0.0357	0.1176
miR-212 prec	209	-0.0342	0.1129
miR-20a	46	0.0322	-0.1061
miR-141	137	0.0322	-0.1061
miR-199a-1	191	0.0319	-0.1053
miR-16-2	39	0.0315	-0.1037
miR-152 prec	151	-0.0283	0.0933
miR-16-1	38	0.0277	-0.0913
miR-34a	78	0.0269	-0.0886
miR-212	208	-0.0265	0.0875
let-7a-1	1	-0.0264	0.0872
miR-128a	114	-0.0259	0.0855
miR-128b	115	0.0254	-0.0839
miR-24-2	54	0.0244	-0.0803
miR-29c	65	0.0224	-0.0738
miR-199a-2	192	0.0223	-0.0736
let-7a-3	4	0.0221	-0.073
miR-191	177	0.0188	-0.062
miR-125a	107	0.0186	-0.0613
miR-30d	72	-0.0185	0.061
miR-29a	62	0.0184	-0.0608
miR-106a	99	0.0177	-0.0584
miR-93-1	83	0.0163	-0.0537
miR-200b	195	0.0159	-0.0524
let-7g	15	0.0158	-0.0521
miR-27a	59	0.0157	-0.0518
miR-96	86	-0.0156	0.0514
let-7b	5	-0.0152	0.0501
miR-138-1	132	-0.0151	0.0499
miR-9-1	24	0.0136	-0.0448
miR-181b-1 prec	211	0.0134	-0.0442
miR-155	157	-0.0128	0.0423
miR-132	121	0.0127	-0.0418
miR-136	130	-0.0112	0.037
let-7i	10	0.0103	-0.034
miR-210	205	0.0074	-0.0245
miR-205	201	0.0073	-0.024
miR-185	170	0.0071	-0.0234
miR-24-1	52	0.007	-0.023
miR-199b	194	0.0064	-0.021
miR-125b-1	109	0.006	-0.0199
miR-206 prec	203	-0.005	0.0166
miR-10a	30	0.0045	-0.015
miR-95	84	0.0045	-0.0149
let-7e	11	-0.0039	0.013
miR-124a-3	106	-0.0028	0.0091
miR-10b	32	0.002	-0.0066
miR-185 prec	171	-0.0014	0.0047
miR-92-1	81	-2.00E-04	5.00E-04
